# Supplementary material for: Engineering the Signal Resolution of a Paper-Based Cell-Free Glutamine Biosensor with Genetic Engineering, Metabolic Engineering, and Process Optimization
Source: MDPI journal article supplement (doi:10.3390/s24103073), 2024-05-12
Supplement: s1 [file s1]

Article: Supplementary Information

# Engineering the Signal Resolution of a Paper-based Cell-free Glutamine Biosensor with Genetic Engineering, Metabolic Engineering, and Process Optimization

Tyler J. Free <sup>1</sup>, Joseph P. Talley <sup>1</sup>, Chad D. Hyer <sup>1</sup>, Catherine J. Miller <sup>1</sup>, Joel S. Griffiths <sup>2</sup>, and Bradley C. Bundy <sup>1,\*</sup>

<sup>1</sup> Department of Chemical Engineering, Brigham Young University, Provo, UT 84602, USA

<sup>2</sup> Department of Microbiology and Molecular Biology, Brigham Young University, Provo, UT 84602, USA

\* Correspondence: bundy@byu.edu

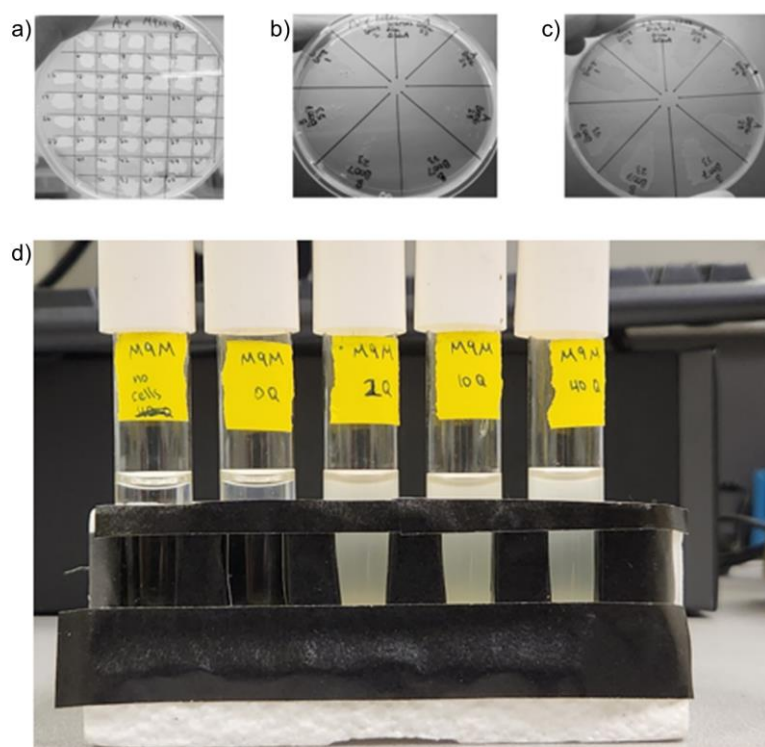

**Figure S1:** BL21 Star DE3  $\Delta lac \Delta glnA$  glutamine auxotroph phenotype. To isolate the auxotrophic colonies after the MAGE mutagenesis protocol, individual colonies were isolated on LB culture plates. Colonies were then numbered and patched onto squares of a minimal media plate (a). The colonies corresponding to the cell patches that failed to grow were patched again on minimal media plates whereon they did not grow (b), and patched again on standard LB plates whereon they did grow for further propagation (c). (d) An original uncropped photograph for Figure 2 showing the test tube rack apparatus used for photographing 5 mL liquid *E. coli* cultures in test tubes, which were incubated at 37 °C and 280 RPM and briefly placed in the test tube rack for photographing at indicated time points.

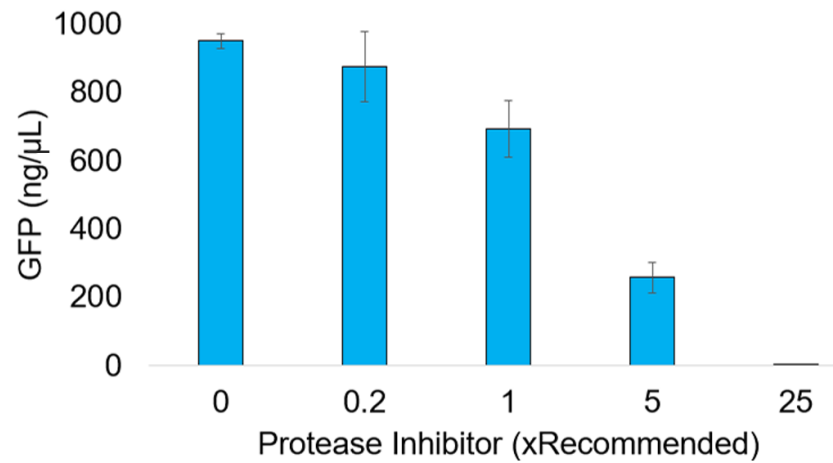

**Figure S2:** Protease inhibitor toleration of cell-free protein synthesis. The cell-free sfGFP production yields in the presence of varying concentrations of protease inhibitor cocktail, given as normalized multipliers relative to the concentration recommended by the manufacturer for cell lysate.

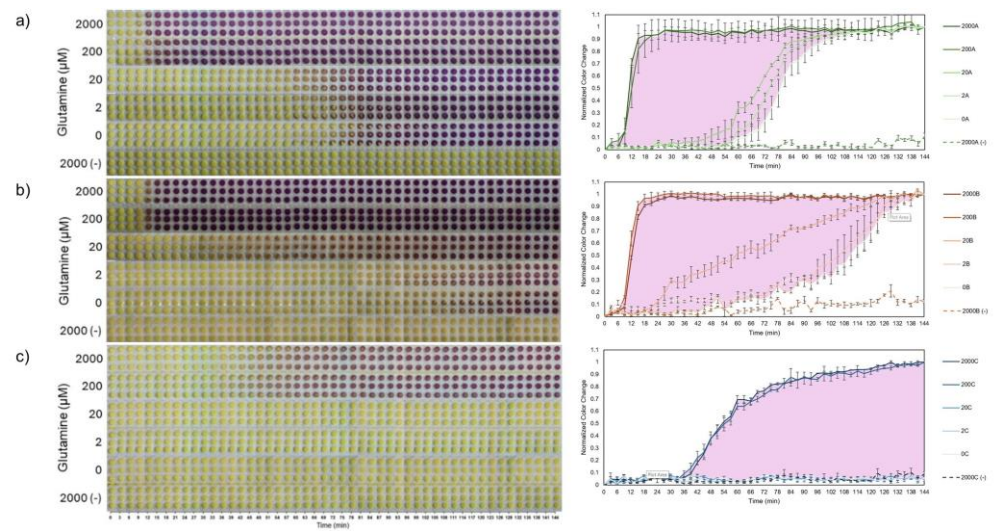

**Figure S3:** Visual and quantitative paper-based, cell-free glutamine biosensor results. Based on the signal-to-background ratio and signal strength tradeoff shown in Figure 1d, the following three biosensor formulations were engineered into a lyophilized, colorimetric, paper-based format and tested with different glutamine concentrations. (a)  $\Delta glnA$  knockout extract with no additives. (b)  $\Delta glnA$  knockout extract with MSO and protease inhibitor added. (c) Filtered  $\Delta glnA$  knockout extract with MSO and protease inhibitor. Glutamine concentrations (in  $\mu\text{M}$ ) are indicated on the axis or legend. The quantitative sensor responses are shown on the normalized plots to the right, where the region between the maximum signal and assay background is shaded.

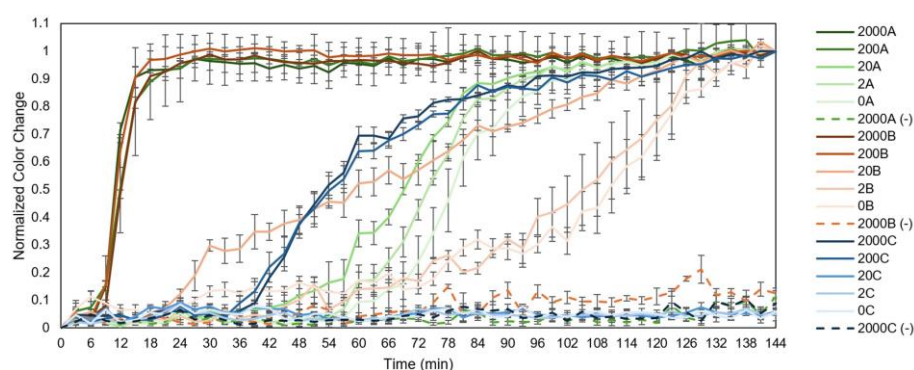

**Figure S4:** A superimposed quantitative comparison of all tested conditions reported in Figure S3.

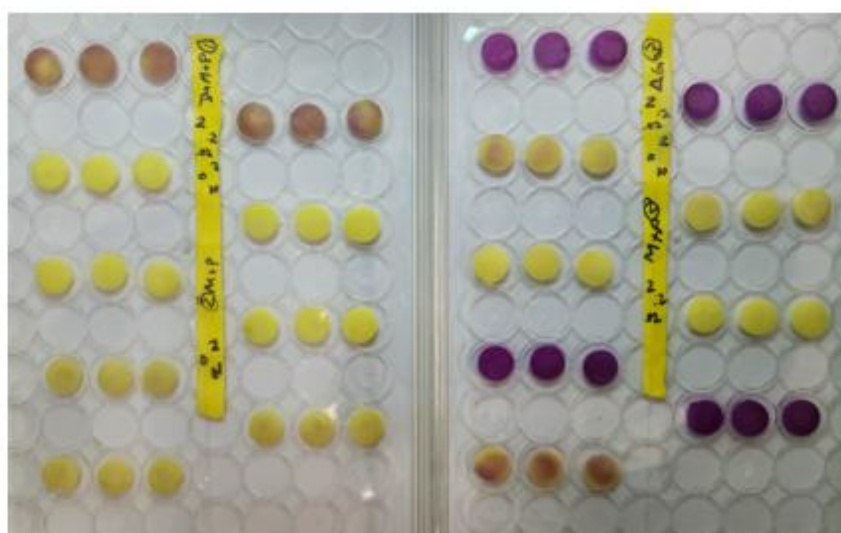

**Figure S5:** An original uncropped photograph showing the glutamine biosensor. Repeat images of the tests were captured every 3 minutes. To create Figure 2 and Figure S3, these images were cropped individually for each set of triplicates using Adobe Lightroom, and the images were oriented in rows to show the time-dependent glutamine outcome for each concentration tested.

**Figure S6:** DNA sequences used in this work.

***lacZ* Single Stranded Oligo (26 bp deletion)**

GCTGCGCTGGAGTGACGGCAGTTATCTGGAAGATCAGGATATGTGTCTCGTT-  
GCTGCATAAACCGACTACACAAATCAGCGATTTCATG

***glnA* Single Stranded Oligo (10 bp deletion)**

CACGTCACTATCCCTGCTCATCAGGTGAATGCTGAATTCTCAAATGTTTGAC-  
GGCTCCTCGATTGGCGGCTGGAAAGGC

**MAGE plasmid pJG1219**

GGTACCAAATTCCAGAAAAGAGGCCTCCCGAAAGGGGGGCCTTTTTTCGTTTTG  
GTCCAATGGCGGCGCGCCATCGAATGGTGCAAAACCTTTCGCGGTATGGCATGA  
TAGCGCCCGGAAGAGAGTCAATTCAGGGTGGTGAATATGAGCCCGAAACGTCGT  
ACCCAGGCAGAACGTGCAATGGAAACCCAGGGTAAACTGATTGCAGCAGCACT  
GGGTGTTCTGCGTGAAAAAGGTTATGCAGGTTTTCTGATTGCAGATGTTCCGGGT  
GCAGCCGGTGTAGCCGTGGTGCACAGAGCCATCATTTTCCGACCAAACCTGGAA  
CTGCTGCTGGCAACCTTTGAATGGCTGTATGAGCAGATTACCGAACGTAGCCGTG  
CACGTCTGGCAAAACTGAAACCGGAAGATGATGTTATTCAGCAGATGCTGGATG  
ATGCAGCAGAATTTTTTCTGGATGATGATTTTAGCATCGGCCTGGATCTGATTGTT  
GCAGCAGATCGTGATCCGGCACTGCGTGAAGGTATTCAGCGTACCGTTGAACGT  
AATCGTTTTGTGTTGAAGATATGTGGCTGGGTGTGCTGGTGAGCCGTGGTCTGA  
GCCGTGATGATGCCGAAGATATTCTGTGGCTGATTTTTAACAGCGTTCGTGGTCT  
GGTAGTTCGTAGCCTGTGGCAGAAAGATAAAGAACGTTTTGAACGTGTGCGTAA  
TAGCACCTGGAAATTGCACGTGAACGTTATGCAAAATTCAAACGTTGATAAGG  
ATCCAATTATTGAAGGCCTCCCTAACGGGGGGCCTTTTTTTGTTTCTGGTCTCCCG  
CTTAACGATCGTTGGCTGAACAAACAGACAATCTGGTCTGTTTGTATTATGAAAA  
ATTTTTCTGTATAATAGATTCAACAAACAGACAATCTGGTCTGTTTGTATTATAGC  
TGTCTAGACTTTAGGAGGTATATATGAGTACTGCACTCGCAACGCTGGCTGGGA  
AGCTGGCTGAACGTGTCGGCATGGATTCTGTGACCCACAGGAAGTATCACCA  
CTCTTCGCCAGACGGCATTTAAAGGTGATGCCAGCGATGCGCAGTTCATCGCATT  
ACTGATCGTTGCCAACCAGTACGGCCTTAATCCGTGGACGAAAGAAATTTACGC  
CTTTCCTGATAAGCAGAATGGCATCGTTCCGGTGGTGGGCGTTGATGGCTGGTCC  
CGCATCATCAATGAAAACCAGCAGTTTGATGGCATGGACTTTGAGCAGGACAAT  
GAATCCTGTACATGCCGGATTTACCGCAAGGACCGTAATCATCCGATCTGCGTTA  
CCGAATGGATGGATGAATGCCGCCGCAACCATTCAAAACTCGCGAAGGCAGA  
GAAATCACGGGGCCGTGGCAGTCGCATCCCAAACGGATGTTACGTCATAAAGCC  
ATGATTCAAGTGTGCCCCTCTGGCCTTCGGATTTGCTGGTATCTATGACAAGGATG  
AAGCCGAGCGCATTGTCGAAAATACTGCATACACTGCAGAACGTCAGCCGGAA  
CGCGACATCACTCCGGTTAACGATGAAACCATGCAGGAGATTAACTACTCTGCTG  
ATCGCCCTGGATAAAACATGGGATGACGACTTATTGCCGCTCTGTTCCAGATAT  
TTCGCCGCGACATTCGTGCATCGTCAGAACTGACACAGGCCGAAGCAGTAAAAG  
CTCTTGATTTCCTGAAACAGAAAGCCGCAGAGCAGAAGGTGGCAGCATGAAGC  
TTTGAGAGAGGAGGATTACAAAATGCCAATTCAGGTCTTACCGCCACAACCTGGC  
GAACCAGATTGCCGCAGGTGAGGTGGTTCGAGCGACCTGCGTCGGTAGTCAAAG  
AACTAGTGAAAAACAGCCTCGATGCAGGTGCGACGCGTATCGATATTGATATCG  
AACGCGGTGGGGCGAAACTTATCCGCATTCTGTGATAACGGCTGCGGTATCAAAA  
AAGATGAGCTGGCGCTGGCGCTGGCTCGTCATGCCACCAGTAAAATCGCCTCTC  
TGGACGATCTCGAAGCCATTATCAGCCTGGGCTTTCGCGGTGAGGCGCTGGCGA  
GTATCAGTTCGGTTTCCCGCCTGACGCTCACTTCACGCACCGCAGAACAGCAGG  
AAGCCTGGCAGGCCTATGCCGAAGGGCGCGATATGAACGTGACGGTAAAACCG  
GCGGCGCATCCTGTGGGGACGACGCTGGAGGTGCTGGATCTGTTCTACAACACC

CCGGCGCGGCGCAAATTCCTGCGCACCGAGAAAACCGAATTTAACCACATTGAT  
GAGATCATCCGCCGCATTGCGCTGGCGCGTTTTCGACGTCACGATCAACCTGTGCG  
ATAACGGTAAAATTGTGCGTCAGTACCGCGCAGTGCCGGAAGGCGGGCAA  
GAACGGCGCTTAGGCGCGATTTGCGGCACCGCTTTTCTTGAACAAGCGCTGGCG  
ATTGAATGGCAACACGGCGATCTCACGCTACGCGGCTGGGTGGCCGATCCAAAT  
CACACCAGCCCCGCACTGGCAGAAATTCAGTATTGCTACGTGAACGGTCGCATG  
ATGCGCGATCGCCTGATCAATCACGCGATCCGCCAGGCCTGCGAAGACAAACTG  
GGGGCCGATCAGCAACCGGCATTTGTGTTGTATCTGGAGATCGACCCACATCAG  
GTGGACGTCAACGTGCACCCCGCCAAACACGAAGTGCCTTCCATCAGTCGCGT  
CTGGTGCATGATTTTATCTATCAGGGCGTGCTGAGCGTGCTACAACAGCAACTGG  
AAACGCCGCTACCGCTGGACGATGAACCCCAACCTGCACCGCGTTCCATTCCGG  
AAAACCGCGTGGCGGCGGGGCGCAATCACTTTGCAGAACCGGCAGCTCGTGAG  
CCGGTAGCTCCGCGCTACACTCCTGCGCCAGCATCAGGCAGTCGTCCGGCTGCC  
CCCTGGCCGAATGCGCAGCCAGGCTACCAGAAACAGCAAGGTGAAGTGTATCG  
CCAGCTTTTGCAAACGCCCGCGCCGATGCAAAAATTAAGCGCCGGAACCGC  
AGGAACCTGCACTTGCGGCGAACAGTCAGAGTTTTGGTCGGGTACTGACTATCG  
TCCATTCCGACTGTGCGTTGCTGGAGCGCGACGGCAACATTTCACTTTTATCCTTG  
CCAGTGGCAGAACGTTGGCTGCGTCAGGCACAATTGACGCCGGGTGAAGCGCCC  
GTTTGCGCCCAGCCGCTGCTGATTCCGTTGCGGCTAAAAGTTTTCTGCCGAAGAAA  
AATCGGCATTAGAAAAAGCGCAGTCTGCCCTGGCGGAATTGGGTATTGATTTCC  
AGTCAGATGCACAGCATGTGACCATCAGGGCAGTGCCTTTACCCTTACGCCAAC  
AAAATTTACAAATCTTGATTCCTGAACTGATAGGCTACCTGGCGAAGCAGTCCGT  
ATTGGAACCTGGCAATATTGCGCAGTGGATTGCACGAAATCTGATGAGCGAACA  
TGCGCAGTGGTCAATGGCACAGGCCATAACCCTGCTGGCGGACGTGGAACGGTT  
ATGTCCGCAACTTGTGAAAACGCCGCCGGGTGGTCTGTTACAATCTGTTGATTTA  
CATCCGGCGATAAAAGCCCTGAAAGATGAGTGAAATGGCGATGAGCATCCTCA  
CGAGCTCTTAGGCTAGCTGACACGCTTAAGGCCTCCCAATCGGGAGGCCTTTTTT  
TGTTCCACTGAGCGTCAGACCCCTTAATAAGATGATCTTCTTGAGATCGTTTTGGT  
CTGCGCGTAATCTCTTGCTCTGAAAACGAAAAAACCGCCTTGACGGGCGGTTTTT  
CGAAGGTTCTCTGAGCTACCAACTCTTTGAACCGAGGTAAGTGGCTTGAGGAG  
CGCAGTCACCAAACTTGTCTTTTCACTTTAGCCTTAACCGGCGCATGACTTCAA  
GACTAACTCCTCTAAATCAATTACCAGTGGCTGCTGCCAGTGGTGCTTTTGCATG  
TCTTTCCGGGTGGACTCAAGACGATAGTTACCGGATAAGGCGCAGCGGTCCGA  
CTGAACGGGGGGTTCGTGCATACAGTCCAGCTTGAGCGAACTGCCTACCCGGA  
ACTGAGTGTGAGGCGTGGAATGAGACAAACGCGGCCATAACAGCGGAATGACA  
CCGGTAAACCGAAAGGCAGGAACAGGAGAGCGCACGAGGGAGCCGCCAGGGG  
GAAACGCCTGGTATCTTTATAGTCCTGTGCGGTTTTCGCCACCACTGATTTGAGCG  
TCAGATTTCTGTGATGCTTGTGAGGGGGGCGGAGCCTATGGAACAAACGGCTTTCG  
CGCGGCCCTCTCACTTCCCTGTAAAGTATCTTCCTGGCATCTTCCAGGAAATCTCC  
GCCCCGTTGTAAGCCATTTCCGCTCGCCGAGTCGAGCAATTGCCAGCTGGAGC  
GCCCTCTGGTAAGGTTGGGAAGCTAGACTTTAGGAGGTATACATATGAGTATTCA  
ACATTTCCGTGTCGCCCTTATTCCCTTTTTTGCGGCATTTTGCCTTCCTGTTTTTGCT

CACCCAGAAACGCTGGTGAAAGTAAAAGATGCTGAAGATCAGTTGGGTGCACG  
AGTGGGTTACATCGAACTGGATCTCAACAGCGGTAAGATCCTTGAGAGTTTTCGC  
CCCGAAGAACGTTTTCCAATGATGAGCACTTTTAAAGTTCTGCTATGTGGCGCGG  
TATTATCCCGTATTGACGCCGGGCAAGAGCAACTCGGTCGCCGCATACACTATTC  
TCAGAATGACTTGGTTGAGTACTCACCAGTCACAGAAAAGCATCTTACGGATGG  
CATGACAGTAAGAGAATTATGCAGTGCTGCCATAACCATGAGTGATAACACTGC  
GGCCAACTTACTTCTGACAACGATCGGAGGACCGAAGGAGCTAACCGCTTTTTT  
GCACAACATGGGGGATCATGTAACTCGCCTTGATCGTTGGGAACCGGAGCTGAA  
TGAAGCCATACCAAACGACGAGCGTGACACCACGATGCCTGTAGCAATGGCAA  
CAACGTTGCGCAAACTATTAAC TGGCGAACTACTTACTCTAGCTTCCCGGCAACA  
ATTAATAGACTGGATGGAGGCGGATAAAGTTGCAGGACCACTTCTGCGCTCGGC  
CCTTCCGGCTGGCTGGTTTATTGCTGATAAATCTGGAGCCGGTGAGCGTGGGTCT  
CGCGGTATCATTGCAGCACTGGGGCCAGATGGTAAGCCCTCCCGTATCGTAGTTA  
TCTACACGACGGGGAGTCAGGCAACTATGGATGAACGAAATAGACAGATCGCT  
GAGATAGGTGCCTCACTGATTAAGCATTGGTAAGAATTGACCCTCGAAACCGGA  
TGCACC

**Disclaimer/Publisher's Note:** The statements, opinions and data contained in all publications are solely those of the individual author(s) and contributor(s) and not of MDPI and/or the editor(s). MDPI and/or the editor(s) disclaim responsibility for any injury to people or property resulting from any ideas, methods, instructions or products referred to in the content.
